# Supplementary material for: Studies concerning the electrophilic amino-alkene cyclisation for the synthesis of bicyclic amines
Source: Royal Society of Chemistry journal article supplement (doi:10.1039/b819610a), 2009-01-01
Supplement: b819610a.pdf [file b819610a.pdf]

Electronic Supporting Information

## Studies Concerning the Electrophilic Amino-Alkene Cyclisation for the Synthesis of Bicyclic Amines

Johannes E. M. N. Klein, Helge Müller-Bunz and Paul Evans\*

*Centre for Synthesis and Chemical Biology, School of Chemistry and Chemical Biology,  
University College Dublin, Dublin 4, Ireland: email: paul.evans@ucd.ie*

### Table of Contents

|                                                                                                       |     |
|-------------------------------------------------------------------------------------------------------|-----|
| 1. General Procedure for the preparation of secondary amines <b>1a – 1f</b>                           | 1-2 |
| 2. Synthesis of <i>N</i> -benzyl-3-cyclohex-1-enylpropan-1-amine ( <b>1g</b> )                        | 3-5 |
| 3. Synthesis of <i>rac</i> -2-cyclohex-1-enyl- <i>N</i> -(1-phenylethyl)ethylamine ( <b>1h</b> )      | 6   |
| 4. Synthesis of ( <i>R</i> )-3-cyclohex-1-enyl- <i>N</i> -(1-phenylethyl)propan-1-amine ( <b>1i</b> ) | 6   |
| 5. Experimental directions for X-ray crystallography                                                  | 7   |
| 6. X-Ray-structure of <b>2a</b>                                                                       | 8   |
| 7. X-Ray-structure of <b>1b·HBr</b>                                                                   | 8   |
| 8. X-Ray-structure of <b>S6</b>                                                                       | 9   |
| 9. References                                                                                         | 9   |



## 1. General Procedure for the preparation of secondary amines 1a – 1f: <sup>[1]</sup>

Suitable aldehyde (1 eq.) and 2-cyclohex-1-enyl-ethylamine (1.1 eq.) were dissolved in anhydrous DCM (3.3-10 ml/mmol). To the solution was added anhydrous MgSO<sub>4</sub> (1g/mmol) and the suspension stirred for 14-23 h at room temperature. The MgSO<sub>4</sub> was filtered-off and washed with DCM (2 x 25 ml). Combined filtrates were concentrated *in vacuo* and the residue dissolved in EtOH (3.3-10 ml/mmol). To the solution was added immediately NaBH<sub>4</sub> (1.5 eq.). The mixture was stirred for 2 h at room temperature. The reaction mixture was concentrated *in vacuo* and 3 M NaOH (5-7 ml/mmol) added. The mixture was extracted with DCM (3 x 5-10 ml/mmol). Combined organic extracts were dried over MgSO<sub>4</sub> or Na<sub>2</sub>SO<sub>4</sub>, filtered and the solvent removed under reduced pressure. The crude amines were purified by column chromatography as indicated below.

Table S1: Preparation of achiral secondary amines.

| Entry             | Aldehyde | Yield <sup>a</sup> |
|-------------------|----------|--------------------|
| 1a                |          | 77%                |
| 1b                |          | 76%                |
| 1c                |          | 95%                |
| 1d                |          | 54%                |
| 1e <sup>[2]</sup> |          | 83%                |
| 1f                |          | 98%                |

<sup>a</sup> Isolated yield after purification by column chromatography.

### *N*-Benzyl-2-cyclohex-1-enyl-ethylamine (1a):<sup>[3]</sup>

The *title compound* was purified by flash column chromatography (EtOAc-cyclohexane; 1:3 to 3:1) to give **1a** as a clear oil. *R<sub>f</sub>* = 0.13 (EtOAc); <sup>1</sup>H-NMR (500 MHz, CDCl<sub>3</sub>) δ (ppm) 7.29-7.33 (m, 4H) 7.21-7.25 (m, 1H) 5.45 (bs, 1H) 3.79 (s, 2H) 2.69 (t, *J* = 7.0 Hz, 2H) 2.15 (t, *J* = 7.0 Hz, 2H) 1.96-2.00 (m, 2H) 1.85-1.90 (m, 2H) 1.58-1.62 (m, 2H) 1.51-1.56 (m, 2H) 1.46 (bs, 1H); <sup>13</sup>C-NMR (125.6 MHz, CDCl<sub>3</sub>) δ (ppm) 140.5 (C) 135.4 (C) 128.3 (CH) 128.0 (CH) 126.8 (CH) 122.7 (CH) 53.9 (CH<sub>2</sub>) 46.9 (CH<sub>2</sub>) 38.3 (CH<sub>2</sub>) 28.1 (CH<sub>2</sub>) 25.2 (CH<sub>2</sub>) 22.9 (CH<sub>2</sub>) 22.4 (CH<sub>2</sub>); IR (NaCl dep from DCM) 3354, 2923, 2834, 1645 cm<sup>-1</sup>; HRMS (ES<sup>+</sup>): calcd for [C<sub>15</sub>H<sub>22</sub>N]<sup>+</sup> 216.1752; found 216.1742.

**2-Cyclohex-1-enyl-N-(4-methoxybenzyl)ethylamine (1b):**

The *title compound* was purified by flash column chromatography (EtOAc-cyclohexane; 2:3 to 3:2) to give **1b** as a clear oil.  $R_f = 0.09$  (EtOAc);  $^1\text{H-NMR}$  (500 MHz,  $\text{CDCl}_3$ )  $\delta$  (ppm) 7.22 (d,  $J = 8.5$  Hz, 2H) 6.86 (d,  $J = 8.5$  Hz, 2H) 5.45 (bs, 1H) 3.79 (s, 3H) 3.72 (s, 2H) 2.67 (t,  $J = 7.0$  Hz, 2H) 2.15 (t,  $J = 7.0$  Hz, 2H) 1.96-2.01 (m, 2H) 1.86-1.90 (m, 2H) 1.58-1.63 (m, 2H) 1.52-1.56 (m, 2H) 1.51 (bs, 1H);  $^{13}\text{C-NMR}$  (125.6 MHz,  $\text{CDCl}_3$ )  $\delta$  (ppm) 158.5 (C) 135.4 (C) 132.7 (C) 129.2 (CH) 122.6 (CH) 113.7 (CH) 55.2 ( $\text{CH}_3$ ) 53.2 ( $\text{CH}_2$ ) 46.8 ( $\text{CH}_2$ ) 38.2 ( $\text{CH}_2$ ) 28.1 ( $\text{CH}_2$ ) 25.2 ( $\text{CH}_2$ ) 22.9 ( $\text{CH}_2$ ) 22.4 ( $\text{CH}_2$ ); IR (neat) 3363, 2924, 2834, 1613, 1512  $\text{cm}^{-1}$ ; HRMS ( $\text{ES}^+$ ): calcd for  $[\text{C}_{16}\text{H}_{24}\text{NO}]^+$  246.1858; found 246.1867.

**2-Cyclohex-1-enyl-N-(2-methoxybenzyl)ethylamine (1c):**

The *title compound* was purified by flash column chromatography (EtOAc-cyclohexane; 2:3 to 1:0 to EtOAc-MeOH; 9:1) to give **1c** as a clear oil.  $R_f = 0.33$  (EtOAc-MeOH; 9:1);  $^1\text{H-NMR}$  (400 MHz,  $\text{CDCl}_3$ )  $\delta$  (ppm) 7.20-7.23 (m, 2H) 6.90 (t,  $J = 7.5$  Hz, 1H) 6.85 (d,  $J = 8.0$  Hz, 1H) 5.44 (bs, 1H) 3.82 (s, 3H) 3.78 (s, 2H) 2.65 (t,  $J = 7.0$  Hz, 2H) 2.14 (t,  $J = 7.0$  Hz, 2H) 1.94-2.01 (m, 2H) 1.82-1.88 (m, 2H) 1.64 (bs, 1H), 1.50-1.62 (m, 4H);  $^{13}\text{C-NMR}$  (100.5 MHz,  $\text{CDCl}_3$ )  $\delta$  (ppm) 157.6 (C) 135.5 (C) 129.7 (CH) 128.6 (C) 128.0 (CH) 122.4 (CH) 120.3 (CH) 110.1 (CH) 55.1 ( $\text{CH}_3$ ) 49.3 ( $\text{CH}_2$ ) 46.8 ( $\text{CH}_2$ ) 38.3 ( $\text{CH}_2$ ) 28.0 ( $\text{CH}_2$ ) 25.2 ( $\text{CH}_2$ ) 22.9 ( $\text{CH}_2$ ) 22.5 ( $\text{CH}_2$ ); IR (neat) 3411, 3065, 3046, 2998, 2926, 2855, 2834, 1665, 1641, 1601  $\text{cm}^{-1}$ ; HRMS ( $\text{ES}^+$ ): calcd for  $[\text{C}_{16}\text{H}_{24}\text{NO}]^+$  246.1858; found 246.1861.

**2-Cyclohex-1-enyl-N-(2,4,6-trimethylbenzyl)ethylamine (1d):**

The *title compound* was purified by flash column chromatography (EtOAc-cyclohexane; 1:4 to 1:0) to give **1d** as a clear oil.  $R_f = 0.42$  (EtOAc);  $^1\text{H-NMR}$  (400 MHz,  $\text{CDCl}_3$ )  $\delta$  (ppm) 6.82 (s, 2H) 5.44 (bs, 1H) 3.72 (s, 2H) 2.75 (t,  $J = 7.0$  Hz, 2H) 2.33 (s, 6H) 2.24 (s, 3H) 2.15 (t,  $J = 7.0$  Hz, 2H) 1.94-2.00 (m, 2H) 1.86-1.91 (m, 2H) 1.50-1.63 (m, 4H) 1.10 (bs, 1H);  $^{13}\text{C-NMR}$  (100.5 MHz,  $\text{CDCl}_3$ )  $\delta$  (ppm) 136.8 (C) 136.2 (C) 135.5 (C) 134.0 (C) 128.9 (CH) 122.7 (CH) 47.5 ( $\text{CH}_2$ , both  $\text{NCH}_2\text{CH}_2$  and  $\text{NCH}_2\text{Ar}$ , as confirmed by HSQC) 38.2 ( $\text{CH}_2$ ) 28.1 ( $\text{CH}_2$ ) 25.2 ( $\text{CH}_2$ ) 23.0 ( $\text{CH}_2$ ) 22.5 ( $\text{CH}_2$ ) 20.8 ( $\text{CH}_3$ ) 19.4 ( $\text{CH}_3$ ); IR (neat) 3321, 3000, 2922, 2856, 2834, 2731, 2670, 1666, 1614, 1581  $\text{cm}^{-1}$ ; HRMS ( $\text{ES}^+$ ): calcd for  $[\text{C}_{18}\text{H}_{28}\text{N}]^+$  258.2222; found 258.2216.

**2-Cyclohex-1-enyl-N-(furan-2-ylmethyl)ethylamine (1e):**

The *title compound* was purified by flash column chromatography (EtOAc-cyclohexane; 1:3 to 1) to give **1e** as a clear oil.  $R_f = 0.36$  (EtOAc);  $^1\text{H-NMR}$  (400 MHz,  $\text{CDCl}_3$ )  $\delta$  (ppm) 7.34 (dd,  $J = 1.0$  Hz,  $J = 2.0$  Hz, 1H) 6.29 (dd,  $J = 2.0$  Hz,  $J = 3.0$  Hz, 1H) 6.15 (dd,  $J = 1.0$  Hz,  $J = 3.0$  Hz, 1H) 5.44 (bs, 1H) 3.77 (s, 2H) 2.66 (t,  $J = 7.0$  Hz, 2H) 2.13 (t,  $J = 7.0$  Hz, 2H) 1.95-2.01 (m, 2H) 1.84-1.89 (m, 2H) 1.51-1.62 (m, 4H) 1.41 (bs, 1H);  $^{13}\text{C-NMR}$  (100.5 MHz,  $\text{CDCl}_3$ )  $\delta$  (ppm) 154.1 (C) 141.6 (CH) 135.3 (C) 122.7 (CH) 110.0 (CH) 106.6 (CH) 46.7 ( $\text{CH}_2$ ) 46.1 ( $\text{CH}_2$ ) 38.2 ( $\text{CH}_2$ ) 28.0 ( $\text{CH}_2$ ) 25.2 ( $\text{CH}_2$ ) 22.9 ( $\text{CH}_2$ ) 22.4 ( $\text{CH}_2$ ); IR (neat) 3320, 3114, 3044, 2995, 2922, 2834, 2654, 1666, 1598, 1506  $\text{cm}^{-1}$ ; HRMS ( $\text{ES}^+$ ): calcd for  $[\text{C}_{13}\text{H}_{20}\text{NO}]^+$  206.1545; found 206.1537.

**N-(2-Bromo-4,5-dimethoxybenzyl)-2-cyclohex-1-enylethylamine (1f):**

The *title compound* was purified by flash column chromatography (EtOAc-cyclohexane; 2:3 to 4:1) to give **1f** as a clear oil.  $R_f = 0.07$  (EtOAc);  $^1\text{H-NMR}$  (500 MHz,  $\text{CDCl}_3$ )  $\delta$  (ppm) 6.99 (s, 1H) 6.91 (s, 1H) 5.46 (bs, 1H) 3.86 (s, 3H) 3.84 (s, 3H) 3.77 (s, 2H) 2.67 (t,  $J = 7.0$  Hz, 2H) 2.15 (t,  $J = 7.0$  Hz, 2H) 1.95-2.00 (m, 2H) 1.85-1.89 (m, 2H) 1.63 (bs, 1H) 1.57-1.62 (m, 2H) 1.51-1.55 (m, 2H);  $^{13}\text{C-NMR}$  (125.6 MHz,  $\text{CDCl}_3$ )  $\delta$  (ppm) 148.5 (C) 148.3 (C) 135.2 (C) 131.5 (C) 122.9 (CH) 115.6 (CH) 113.7 (C) 113.2 (CH) 56.2 ( $\text{CH}_3$ ) 56.0 ( $\text{CH}_3$ ) 53.6 ( $\text{CH}_2$ ) 46.7 ( $\text{CH}_2$ ) 38.3 ( $\text{CH}_2$ ) 28.0 ( $\text{CH}_2$ ) 25.2 ( $\text{CH}_2$ ) 22.9 ( $\text{CH}_2$ ) 22.5 ( $\text{CH}_2$ ); IR (neat) 3357.

2995, 2924, 2836, 1644, 1603, 1504  $\text{cm}^{-1}$ ; HRMS ( $\text{ES}^+$ ): calcd for  $[\text{C}_{17}\text{H}_{25}\text{NO}_2\text{Br}]^+$  354.1069; found 354.1051.

## 2. Synthesis of *N*-benzyl-3-cyclohex-1-enylpropan-1-amine (**1g**):

The synthesis of 3-cyclohex-1-enylpropan-1-ol (**S7**) had previously been reported by Crotti *et al.*<sup>[4]</sup> The preparation of cyclohex-1-enylethanol (**S4**) following this report resulted in partial isomerization of the double bond. Hence cyclohex-1-enylethanol (**S4**) was prepared by saponification of the nitrile **S3**<sup>[5]</sup> and subsequent reduction with LAH.<sup>[6]</sup> The alcohol **S4** was converted to the nitrile **S5** by Mitsunobu-reaction, using conditions that have been reported by Fukuyama *et al.*<sup>[7]</sup> Saponification of the nitrile **S5** and reduction of the free acid **S6** was carried out similarly to the reported procedure by Crotti *et al.*<sup>[4]</sup> The alcohol **S7** was oxidized to the aldehyde **S8** under standard conditions using PCC/celite, followed by reductive amination to give the secondary amine **1g**. Conditions for the reductive amination using  $\text{NaBH}(\text{OAc})_3$  were previously described by Abdel-Magid *et al.*<sup>[8]</sup>

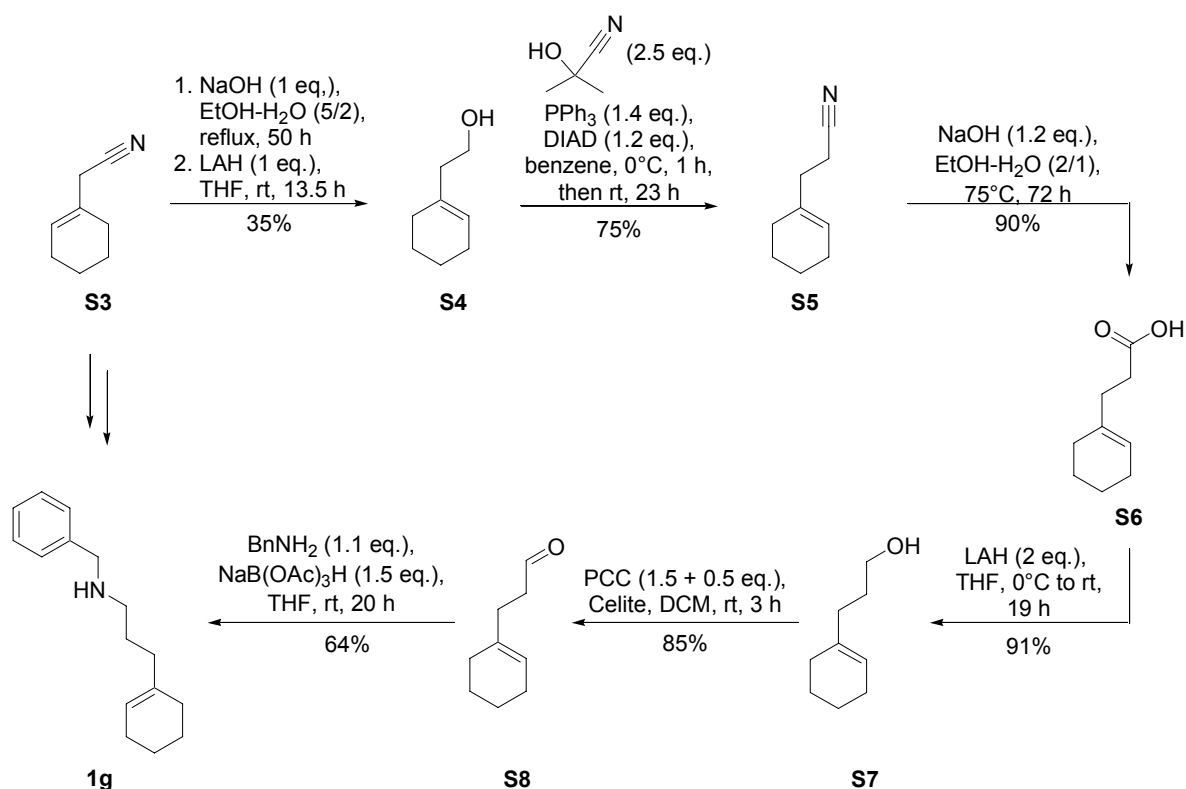

Scheme S1: Synthesis of secondary amine **1g**.

### Cyclohex-1-enylethanol (**S4**):<sup>[4]</sup>

2-Cyclohex-1-enylacetonitrile (**S3**) (2.6 ml, 20 mmol, 1 eq.) was dissolved in a mixture of EtOH-H<sub>2</sub>O (28 ml, 5:2) and NaOH (800 mg, 20 mmol, 1 eq.) was added solid. After all NaOH was dissolved the mixture was heated to reflux for 50 h. Solvent was removed under reduced pressure and the residue partitioned between H<sub>2</sub>O (100 ml) and Et<sub>2</sub>O (100 ml). Aqueous layer was extracted with Et<sub>2</sub>O (100 ml). Organic extracts were disposed of, the aqueous layer was acidified to pH ~ 1 with conc. HCl and extracted with Et<sub>2</sub>O (4 x 100 ml). Combined organic extracts were washed with brine (50 ml), dried over MgSO<sub>4</sub> and the solvent removed under reduced pressure. The crude 2-cyclohex-1-enylacetic acid was subjected to the next reaction without further purification.

LAH (790 mg, 20 mmol, 1 eq.) was suspended in anhydrous THF (20 ml). The crude 2-cyclohex-1-enylacetic acid was added, as a solution in anhydrous THF (10 ml) in a dropwise fashion at room temperature. The mixture was stirred for 13.5 h and subsequently cooled to 0°C and quenched by careful addition of H<sub>2</sub>O (20 ml) followed by 20% H<sub>2</sub>SO<sub>4</sub> (20 ml). The mixture was transferred to a separating funnel and extracted with EtOAc (2 x 100 ml). Combined organic extracts were washed with brine (40 ml), dried over MgSO<sub>4</sub> and the solvent removed under reduced pressure. The crude product **S4** was purified by column chromatography (pentane-Et<sub>2</sub>O; 7:3) to give pure product (889 mg, 35% yield) as a clear oil. *R<sub>f</sub>* = 0.33 (pentane-Et<sub>2</sub>O; 7:3); <sup>1</sup>H-NMR (500 MHz, CDCl<sub>3</sub>) δ (ppm) 5.51 (bs, 1H) 3.64 (t, *J* = 6.0 Hz, 2H) 2.19 (t, *J* = 6.0 Hz, 2H) 1.97-2.03 (m, 2H) 1.91-1.96 (m, 2H) 1.60-1.65 (m, 2H) 1.53-1.58 (m, 3H); <sup>13</sup>C-NMR (125 MHz, CDCl<sub>3</sub>) δ (ppm) 134.0 (C) 124.2 (CH) 60.2 (CH<sub>2</sub>) 41.1 (CH<sub>2</sub>) 28.0 (CH<sub>2</sub>) 25.2 (CH<sub>2</sub>) 22.8 (CH<sub>2</sub>) 22.3 (CH<sub>2</sub>); IR (neat) 3356, 2926, 1643 cm<sup>-1</sup>.

### 3-Cyclohex-1-enylpropanitrile (**S5**):<sup>[3]</sup>

A mixture of cyclohex-1-enylethanol (**S4**) (3.1 g, 24.6 mmol, 1 eq.), PPh<sub>3</sub> (9.00 g, 34.3 mmol, 1.4 eq.) and acetone cyanohydrin (5.6 ml, 61.5 mmol, 2.5 eq.) were added to benzene (140 ml) at room temperature. The mixture was cooled to 0°C and DIAD (5.8 ml, 29.52 mmol, 1.2 eq.) added as a solution in benzene (15 ml + 5 ml rinse) by means of a syringe in a dropwise fashion. Mixture was stirred at 0°C for 1 h and subsequently for 23 h at room temperature. Solvent was removed under reduced pressure and the residue filtered through a pad of silica (cHex-EtOAc; 19/1) the solvent removed under reduced pressure and the obtained residue subjected to column chromatography (cHex-EtOAc; 100:0 to 19:1) to give **S5** as a clear oil (2.51 g, 75% yield). *R<sub>f</sub>* = 0.53 (cHex-EtOAc; 4:1); <sup>1</sup>H-NMR (500 MHz, CDCl<sub>3</sub>) δ (ppm) 5.51 (bs, 1H) 2.40 (t, *J* = 7.5 Hz, 2H) 2.24 (t, *J* = 7.5 Hz, 2H) 1.97-2.02 (m, 2H) 1.88-1.92 (m, 2H) 1.59-1.64 (m, 2H) 1.51-1.56 (m, 2H); <sup>13</sup>C-NMR (125 MHz, CDCl<sub>3</sub>) δ (ppm) 133.8 (C) 123.6 (CH) 119.5 (C) 33.2 (CH<sub>2</sub>) 27.7 (CH<sub>2</sub>) 25.0 (CH<sub>2</sub>) 22.5 (CH<sub>2</sub>) 22.0 (CH<sub>2</sub>) 15.9 (CH<sub>2</sub>); IR (neat) 3367, 2927, 2858, 2842, 2245, 1644 cm<sup>-1</sup>.

### 3-Cyclohex-1-enylpropanoic acid (**S6**):<sup>[3]</sup>

3-Cyclohex-1-enylpropanenitrile (**S5**) (400 mg, 2.96 mmol, 1 eq.) was dissolved in a mixture of EtOH-H<sub>2</sub>O (4.5 ml, 2:1). To the solution was added NaOH (0.142 g, 3.56 mmol, 1.2 eq.) and the mixture heated to 75°C for 72 h, TLC indicated consumption of starting material. Solvent was removed under reduced pressure and the residue partitioned between H<sub>2</sub>O (20 ml) and Et<sub>2</sub>O (20 ml). Ether layer was disposed of, aqueous layer was acidified to pH ~ 1 using conc. HCl and extracted with Et<sub>2</sub>O (4 x 25 ml). Combined org. layers were dried over MgSO<sub>4</sub> and the solvent removed under reduced pressure. Desired product (411 mg, 90% yield) was obtained in pure form without further purification as a low melting white solid. The product crystallized upon storage at 5°C to give X-ray quality crystals. M.pt. < 30°C; <sup>1</sup>H-NMR (500 MHz, CDCl<sub>3</sub>) δ (ppm) 5.44 (bs, 1H), 2.46 (t, *J* = 7.5 Hz, 2H) 2.26 (t, *J* = 7.5 Hz, 2H) 1.95-2.01 (m, 2H) 1.90-1.95 (m, 2H) 1.60-1.64 (m, 2H) 1.52-1.57 (m, 2H); <sup>13</sup>C-NMR (125 MHz, CDCl<sub>3</sub>) δ (ppm) 179.7 (C) 135.8 (C) 121.7 (CH) 32.61 (CH<sub>2</sub>) 32.60 (CH<sub>2</sub>) 28.3 (CH<sub>2</sub>) 25.5 (CH<sub>2</sub>) 22.9 (CH<sub>2</sub>) 22.4 (CH<sub>2</sub>); IR (CH<sub>2</sub>Cl<sub>2</sub>) 3365, 2924, 1701 cm<sup>-1</sup>; HRMS (ES<sup>-</sup>): calcd for [C<sub>9</sub>H<sub>13</sub>O<sub>2</sub>]<sup>-</sup> 153.0916; found 153.0909.

### 3-Cyclohex-1-enylpropan-1-ol (**S7**):<sup>[3,9]</sup>

LAH (175 mg, 4.6 mmol, 2 eq.) was suspended in anhydrous THF (5 ml) and the suspension cooled to 0°C. 3-Cyclohex-1-enylpropanoic acid (**S6**) (355 mg, 2.3 mmol, 1 eq.) was added as a solution in anhydrous THF (5 ml). The mixture was stirred for 19 h, during which time it slowly reached room temperature. The reaction was carefully quenched with H<sub>2</sub>O (5 ml) and further with 10% H<sub>2</sub>SO<sub>4</sub> (5 ml). The mixture was transferred to a separating funnel and was extracted with Et<sub>2</sub>O (3 x 20 ml). Combined organic extracts were washed with brine (20 ml),

dried over  $\text{MgSO}_4$  and the solvent removed under reduced pressure. The crude product was purified by column chromatography (pentane- $\text{Et}_2\text{O}$ ; 7:3) to give **S7** (294 mg, 91% yield) as a clear oil.  $R_f$  = 0.47 (cHex-EtOAc; 1:1);  $^1\text{H-NMR}$  (500 MHz,  $\text{CDCl}_3$ )  $\delta$  (ppm) 5.42 (bs, 1H) 3.61 (t,  $J$  = 6.5 Hz, 2H) 1.94-2.02 (m, 4H) 1.89-1.94 (m, 2H) 1.63-1.71 (m, 3H) 1.58-1.62 (m, 2H) 1.50-1.56 (2H);  $^{13}\text{C-NMR}$  (125 MHz,  $\text{CDCl}_3$ )  $\delta$  (ppm) 137.3 (C) 121.2 (CH) 62.8 ( $\text{CH}_2$ ) 34.3 ( $\text{CH}_2$ ) 30.5 ( $\text{CH}_2$ ) 28.2 ( $\text{CH}_2$ ) 25.2 ( $\text{CH}_2$ ) 22.9 ( $\text{CH}_2$ ) 22.5 ( $\text{CH}_2$ ); IR (neat) 3343, 2927, 1643  $\text{cm}^{-1}$ ; MS (ES<sup>-</sup>): found 139.0697.

### 3-Cyclohex-1-enylpropanal (**S8**):<sup>19l</sup>

3-Cyclohex-1-enylpropan-1-ol (**S7**) (280 mg, 2 mmol, 1 eq.) was dissolved in DCM (20 ml). To the solution was added celite (647 mg) and PCC (647 mg, 3 mmol, 1.5 eq.). Suspension was stirred for 2 h at room temperature. TLC indicated unreacted starting material, which lead to further addition of PCC (216 mg, 1 mmol, 0.5 eq.) and celite (216 mg). The suspension was stirred for 1 h, the solvent removed under reduced pressure and the residue resuspended in  $\text{Et}_2\text{O}$  (20 ml) and filtered through a pad of celite. The solvent was removed under reduced pressure and the crude material immediately subjected to column chromatography (pentane- $\text{Et}_2\text{O}$ ; 19:1) to give aldehyde **S8** (235 mg, 85% yield) as a clear oil.  $R_f$  = 0.49 (pentane- $\text{Et}_2\text{O}$ ; 4:1);  $^1\text{H-NMR}$  (500 MHz,  $\text{CDCl}_3$ )  $\delta$  (ppm) 9.74 (t,  $J$  = 2.0 Hz, 1H) 5.40 (bs, 1H) 2.50 (dt,  $J$  = 2.0 Hz,  $J$  = 7.5 Hz, 2H) 2.25 (t,  $J$  = 7.5 Hz, 2H) 1.93-1.99 (m, 2H) 1.87-1.92 (m, 2H) 1.57-1.63 (m, 2H) 1.50-1.55 (m, 2H);  $^{13}\text{C-NMR}$  (125 MHz,  $\text{CDCl}_3$ )  $\delta$  (ppm) 202.6 (CH) 135.7 (C) 121.8 (CH) 41.8 ( $\text{CH}_2$ ) 30.1 ( $\text{CH}_2$ ) 28.4 ( $\text{CH}_2$ ) 25.1 ( $\text{CH}_2$ ) 22.8 ( $\text{CH}_2$ ) 22.3 ( $\text{CH}_2$ ); IR (neat) 3372, 2925, 2853, 2716, 1725, 1652  $\text{cm}^{-1}$ .

### *N*-Benzyl-3-cyclohex-1-enylpropan-1-amine (**1g**):

3-Cyclohex-1-enylpropanal (**S8**) (274 mg, 1.98 mmol, 1 eq.) was dissolved in anhydrous THF (25 ml) under an atmosphere of  $\text{N}_2$ . Benzylamine (238  $\mu\text{l}$ , 2.18 mmol, 1.1 eq.) was added at room temperature and the solution stirred for 30 min.  $\text{NaBH}(\text{OAc})_3$  (630 mg, 2.97 mmol, 1.5 eq.) was added in one portion and the suspension stirred for 20 h at room temperature. The mixture was concentrated under reduced pressure and subsequently partitioned between 3 M NaOH (25 ml) and  $\text{Et}_2\text{O}$  (40 ml). The aqueous layer was extracted with  $\text{Et}_2\text{O}$  (2 x 40 ml). Combined organic layers were dried over  $\text{MgSO}_4$  and the solvent removed under reduced pressure. The crude was subject to column chromatography (cHex-EtOAc; 4:1 to 0:1) to give pure product (290 mg, 64% yield) as a clear oil.  $R_f$  = 0.43 (MeOH-EtOAc; 1:9);  $^1\text{H-NMR}$  (400 MHz,  $\text{CDCl}_3$ )  $\delta$  (ppm) 7.30-7.31 (m, 4H) 7.21-7.26 (m, 1H) 5.37 (bs, 1H) 3.78 (s, 2H) 2.16 (t,  $J$  = 7.0 Hz, 2H) 1.96 (t,  $J$  = 7.0 Hz, 4H) 1.87-1.93 (m, 2H) 1.57-1.65 (m, 4H) 1.49-1.56 (m, 2H) 1.43 (bs, 1H);  $^{13}\text{C-NMR}$  (100.5 MHz,  $\text{CDCl}_3$ )  $\delta$  (ppm) 140.5 (C) 137.4 (C) 128.3 (CH) 128.0 (CH) 126.8 (CH) 121.0 (CH) 54.0 ( $\text{CH}_2$ ) 49.2 ( $\text{CH}_2$ ) 35.7 ( $\text{CH}_2$ ) 28.2 ( $\text{CH}_2$ ) 28.0 ( $\text{CH}_2$ ) 25.2 ( $\text{CH}_2$ ) 23.0 ( $\text{CH}_2$ ) 22.5 ( $\text{CH}_2$ ); IR (neat) 3419, 3062, 3027, 2926, 28.34, 1945, 1871, 1807, 1668, 1553  $\text{cm}^{-1}$ ; HRMS (ES<sup>+</sup>): calcd for  $[\text{C}_{16}\text{H}_{24}\text{N}]^+$  230.1909; found 230.1916.

### 3. Synthesis of *rac*-2-cyclohex-1-enyl-*N*-(1-phenylethyl)ethanamine (**1h**):<sup>[10]</sup>

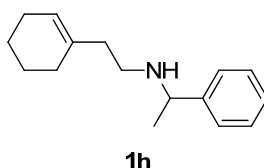

Acetophenone (233  $\mu$ l, 2 mmol, 1 eq.) and 2-cyclohex-1-enyl-ethanamine (**S1**) (278  $\mu$ l, 2 mmol, 1 eq.) were combined in anhydrous DCM (7 ml) under an atmosphere of  $N_2$ . To the mixture was added glacial AcOH (115  $\mu$ l, 2 mmol, 1 eq.) and  $NaBH(OAc)_3$  (593 mg, 2.8 mmol, 1.4 eq.) at room temperature. The mixture was stirred for 72 h at room temperature, then poured into 3 M NaOH (20 ml) and extracted with  $Et_2O$  (3 x 25 ml). Combined organic extracts were dried over  $MgSO_4$  and the solvent removed under reduced pressure. The crude product was subject to column chromatography (cHex-EtOAc; 9:1 to 1:1) to give pure product **1h** (337 mg, 73% yield) as a clear oil.  $R_f = 0.20$  (EtOAc);  $^1H$ -NMR (400 MHz,  $CDCl_3$ )  $\delta$  (ppm) 7.27-7.33 (m, 4H) 7.20-7.25 (m, 1H) 5.43 (bs, 1H) 3.75 (q,  $J = 6.5$  Hz, 1H) 2.45-2.60 (m, 2H) 2.10 (t,  $J = 7.0$  Hz, 2H) 1.94-2.01 (m, 2H) 1.79-1.84 (m, 2H) 1.48-1.61 (m, 5H) 1.34 (d,  $J = 6.5$  Hz, 3H);  $^{13}C$ -NMR (100.5 MHz,  $CDCl_3$ )  $\delta$  (ppm) 145.8 (C) 135.4 (C) 128.3 (CH) 126.7 (CH) 126.4 (CH) 122.6 (CH) 58.2 (CH) 45.3 ( $CH_2$ ) 38.3 ( $CH_2$ ) 28.0 ( $CH_2$ ) 25.2 ( $CH_2$ ) 24.2 ( $CH_3$ ) 22.9 ( $CH_2$ ) 22.4 ( $CH_2$ ); IR (neat) 3369, 2924, 2835, 1643  $cm^{-1}$ ; HRMS ( $ES^+$ ): calcd for  $[C_{16}H_{24}N]^+$  230.1909; found 230.1902; Anal. Calcd. for  $C_{16}H_{23}N$ : C (83.79) H (10.11) N (6.11), Found: C (83.55) H (10.17) N (6.07).

### 4. Synthesis of (*R*)-3-cyclohex-1-enyl-*N*-(1-phenylethyl)propan-1-amine (**1i**):<sup>[10]</sup>

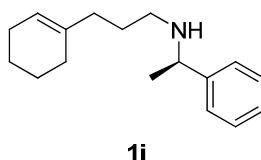

3-Cyclohex-1-enylpropanal (**S8**) (195 mg, 1.41 mmol, 1 eq.) was dissolved in anhydrous THF under an atmosphere of  $N_2$ . (*R*)-(+)- $\alpha$ -Methyl-benzylamine (197  $\mu$ l, 1.55 mmol, 1.1 eq.) was added by means of a syringe and the mixture stirred for 30 min at room temperature prior to addition of  $NaBH(OAc)_3$  (448 mg, 2.11 mmol, 1.5 eq.). Mixture was stirred at room temperature for 22 h. Solvent was removed under reduced pressure and the residue partitioned between  $Et_2O$  (30 ml) and 3 M NaOH (20 ml). Aqueous layer was extracted with  $Et_2O$  (2 x 30 ml), combined organic layers were dried over  $MgSO_4$ , solvent removed under reduced pressure. The crude material was subjected to column chromatography (cHex-EtOAc; 3:1) to give **1i** (239 mg, 70% yield) as a pale yellow oil.  $[\alpha]_D = +47.95$  (c 0.1,  $CHCl_3$ );  $R_f = 0.16$  (EtOAc);  $^1H$ -NMR (500 MHz,  $CDCl_3$ )  $\delta$  (ppm) 7.28-7.33 (m, 4H), 7.20-7.25 (m, 1H) 5.36 (bs, 1H) 3.74 (q,  $J = 6.6$  Hz, 1H) 2.38-2.50 (m, 2H) 1.85-1.97 (m, 6H) 1.55-1.61 (3H) 1.48-1.55 (3H) 1.34 (d,  $J = 6.6$  Hz, 3H) 1.20-1.33 (bs, 1H);  $^{13}C$ -NMR (125 MHz,  $CDCl_3$ )  $\delta$  (ppm) 145.9 (C) 137.4 (C) 128.3 (CH) 126.7 (CH) 126.5 (CH) 120.9 (CH) 58.3 (CH) 47.5 ( $CH_2$ ) 35.7 ( $CH_2$ ) 28.2 ( $CH_2$ ) 28.1 ( $CH_2$ ) 25.2 ( $CH_2$ ) 24.3 ( $CH_3$ ) 23.0 ( $CH_2$ ) 22.5 ( $CH_2$ ); IR (NaCl dep from DCM) 3338, 3060, 3025, 2925, 2856, 2835, 1663, 1604  $cm^{-1}$ . HRMS ( $ES^+$ ): calcd for  $[C_{17}H_{26}N]^+$  244.2065; found 244.2055.



## 5. Experimental directions for X-ray crystallography

Crystals were grown according to experimental procedures outlined in the text. Data were collected using a Bruker SMART APEX CCD area detector diffractometer at 100 K (**2a**: eva27, **1b**·HBr: eva30, **9a**·HCl: eva32, **12a**: eva36, **S6**: eva40), or 293K (**2h**·HCl: eva45, **2i**·HCl: eva46). A full sphere of reciprocal space was scanned by phi-omega scans. Pseudo-empirical absorption correction based on redundant reflections was performed by the program SADABS (X-1). The structures were solved by direct methods using SHELXS-97 (X-2) and refined by full matrix least-squares on  $F^2$  for all data using SHELXL-97 (X-3).

The treatment of the hydrogen atoms varied from compound to compound, depending on the quality of the dataset. For **2a**: eva27 and **1b**·HBr: eva30, all hydrogen atoms were located in the difference Fourier map and allowed to refine freely. In **12a**: eva36 and **2i**·HCl: eva46, hydrogen atoms were added at calculated positions and refined using a riding model. Their isotropic temperature factors were fixed to 1.2 times (1.5 times for methyl groups) the equivalent isotropic displacement parameters of the carbon atom the H-atom is attached to. In the remaining compounds hydrogen atoms attached to carbon were treated as in **12a**: eva36 and **2i**·HCl: eva46, and hydrogen atoms attached to nitrogen or oxygen were treated as in **2a**: eva 27 and **1b**·HBr: eva30. Anisotropic thermal displacement parameters were used for all non-hydrogen atoms. In **12a**: eva36 the refinement of the absolute structure parameter did not converge properly. Since the crystal had grown from a solution of the racemic mixture the absolute structure parameter was fixed to 0.5. In **S6**: eva40, the two disorder parts were restrained to have the same shape using SADI commands. In **2i**·HCl: eva46 DELU (rigid bond) restraints were applied to all thermal displacement parameters.

(X-1) Sheldrick, G.M. SADABS, Bruker AXS Inc., Madison, WI 53711, 2000.

(X-2) Sheldrick, G. M., SHELXS-97, University of Göttingen 1997.

(X-3) Sheldrick, G. M., SHELXL-97-2, University of Göttingen 1997.

## 6. X-Ray-structure of 2a

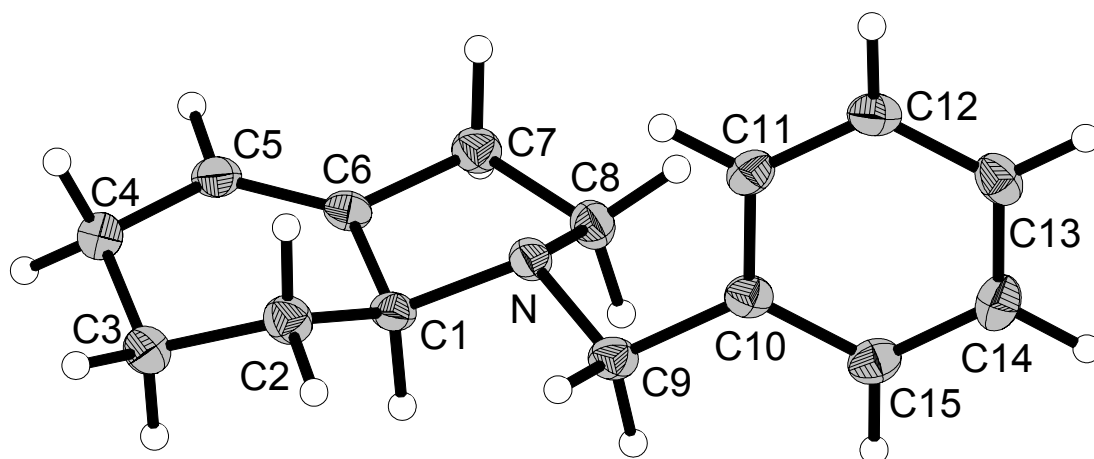

Figure S1: X-Ray Structure of 2a, thermal ellipsoid drawn on the 50% level. (X-ray depicted using Mercury 1.4)

Compound 2a; Molecular formula:  $C_{15}H_{19}N$ ; Formula weight: 213.31  $gmol^{-1}$ ; Crystal system: Triclinic; Unit cell dimensions:  $a = 5.8108(8) \text{ \AA}$ ,  $\alpha = 68.858(3)^\circ$ ;  $b = 10.4031(15) \text{ \AA}$ ,  $\beta = 87.535(3)^\circ$ ;  $c = 10.8646(15) \text{ \AA}$ ,  $\gamma = 79.418(3)^\circ$ ; Volume: 601.95(15)  $\text{\AA}^3$ ; Temperature: 100(2) K; Space group: P-1; Number of formula units in unit cell (Z): 2; Reflections collected: 6448; Independent reflections: 2129 [R(int) = 0.0348]; Final R indices [I>2sigma(I)]: R1 = 0.0370, wR2 = 0.0885; R indices (all data): R1 = 0.0461, wR2 = 0.0934.

## 7. X-Ray-structure of 1b·HBr.

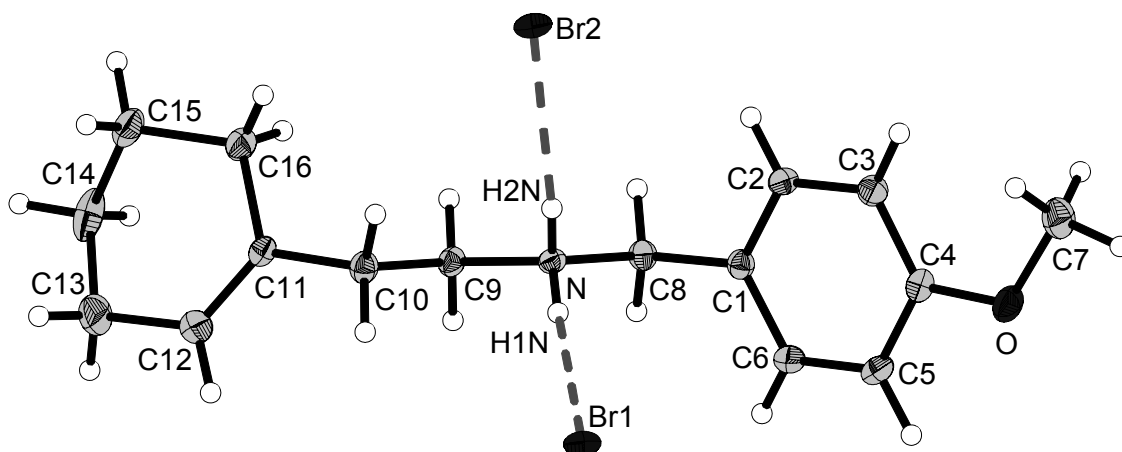

Figure S2: X-Ray Structure of 1b·HBr, thermal ellipsoid drawn on the 50% level. (X-ray depicted using Mercury 1.4)

Compound 1b HBr; Molecular formula:  $C_{16}H_{24}NOBr$ ; Formula weight: 326.27  $gmol^{-1}$ ; Crystal system: Monoclinic; Unit cell dimensions:  $a = 29.078(7) \text{ \AA}$ ,  $\alpha = 90^\circ$ ;  $b = 4.8656(12) \text{ \AA}$ ,  $\beta = 96.268(5)^\circ$ ;  $c = 22.535(5) \text{ \AA}$ ,  $\gamma = 90^\circ$ ; Volume: 3169.3(13)  $\text{\AA}^3$ ; Temperature: 100(2) K; Space group: C2/c; Number of formula units in unit cell (Z): 8; Reflections collected: 32279; Independent reflections: 4257 [R(int) = 0.0307]; Final R indices [I>2sigma(I)]: R1 = 0.0255, wR2 = 0.0626; R indices (all data): R1 = 0.0296, wR2 = 0.0645.

## 8. X-Ray-structure of S6

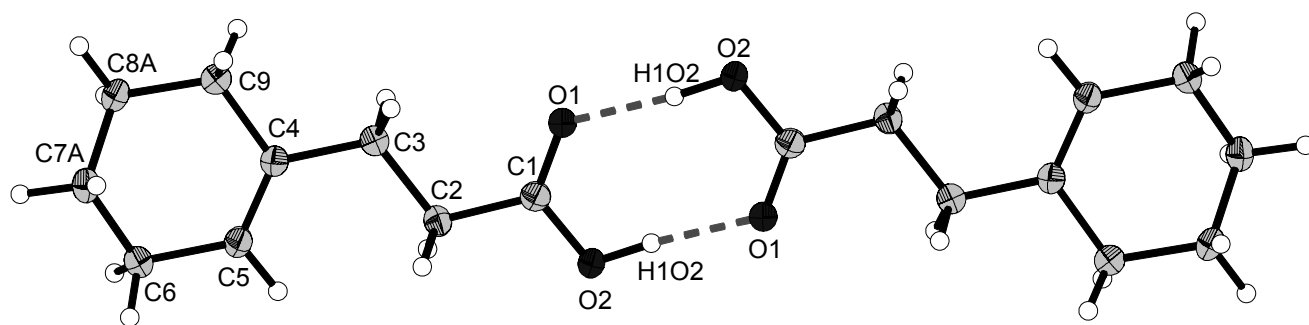

Figure S3: X-Ray Structure of S6, thermal ellipsoid drawn on the 50% level. Unit cell contained three different types of molecule S6, of which one contained disorder (not shown). (X-ray depicted using Mercury 1.4)

Compound S6; Molecular formula: C<sub>9</sub>H<sub>14</sub>O<sub>2</sub>; Formula weight: 154.20 gmol<sup>-1</sup>; Crystal system: Triclinic; Unit cell dimensions: a = 7.3608(7) Å,  $\alpha$  = 103.092(2)°; b = 12.1760(11) Å,  $\beta$  = 93.820(2)°; c = 15.1409(14) Å,  $\gamma$  = 100.303(2)°; Volume: 1292.3(2) Å<sup>3</sup>; Temperature: 100(2) K; Space group: P-1; Number of formula units in unit cell (Z): 6; Reflections collected: 19207; Independent reflections: 4122 [R(int) = 0.0327]; Final R indices [I>2sigma(I)]: R1 = 0.0353, wR2 = 0.0810; R indices (all data): R1 = 0.0431, wR2 = 0.0850.

## 9. References

- [1] P. Evans, S. Kelleher, J. Muldoon and H. Müller-Bunz, *Tetrahedron Lett.*, 2007, **48**, 4733.
- [2] 2-Bromo-4,5-dimethoxybenzaldehyde was prepared according to previously reported procedure: S. Chandrasekhar, N. Ramakrishna Reddy and Y. Srinivasa Rao, *Tetrahedron*, 2006, **62**, 12098.
- [3] For a different route, including characterization, see the supporting information of: D. Solé, Y. Concho, A. Llebaria, J. M. Moretó, and A. Delgado, *J. Org. Chem.*, 1996, **61**, 5895.
- [4] P. Crotti, F. Badalassi, V. Di Bussolo, L. Favero and M. Pineschi, *Tetrahedron*, 2001, **57**, 8559.
- [5] D. Lednicer, P. VonVoigtlander and E. Emmert, *J. Med. Chem.*, 1981, **24**, 404.
- [6] H. Ferraz and L. Longo Jr., *J. Org. Chem.*, 2002, **67**, 3518.
- [7] K. Uchida, S. Yokoshima, T. Kan and T. Fukuyama, *Org. Lett.*, 2006, **8**, 5311.
- [8] For general conditions using NaBH(OAc)<sub>3</sub> in reductive aminations see: A. F. Abdel-Magid, K. G. Carson, B. D. Harris, C. A. Maryanoff and R. D. Shah, *J. Org. Chem.*, 1996, **61**, 3849.
- [9] For a different approach to S7 and S8 see: Z.-H. Shao, F.-Z. Peng, J.-B. Chen, C.-Y. Wang, R. Huang, Y.-Q. Tu, L. Li and H.-B. Zhang, *Synth. Commun.*, 2004, **34**, 2031.
- [10] For a different route, including characterization, see: Z.-H. Shao, F.-Z. Peng, B.-K. Zhu, Y.-Q. Tu and H.-B. Zhang, *Chin. J. Chem.*, 2004, **22**, 727.
